# Supplementary material for: Amino-functionalized mesoporous silica nanospheres (MSN-NH2) as sorbent for extraction and concentration of synthetic dyes from foodstuffs prior to HPLC analysis
Source: Royal Society of Chemistry journal article supplement (doi:10.1039/c8ay02215a), 2018-11-26
Supplement: c8ay02215a1.pdf [file c8ay02215a1.pdf]

## **Electronic Supplementary Information**

### **Amino-functionalized mesoporous silica nanospheres (MSN-NH<sub>2</sub>) as sorbent for extraction and concentration of synthetic dyes from foodstuffs prior to HPLC analysis**

Peige Qin, Yixin Yang, Wenqi Li, Jing Zhang, Qian Zhou, Minghua Lu\*

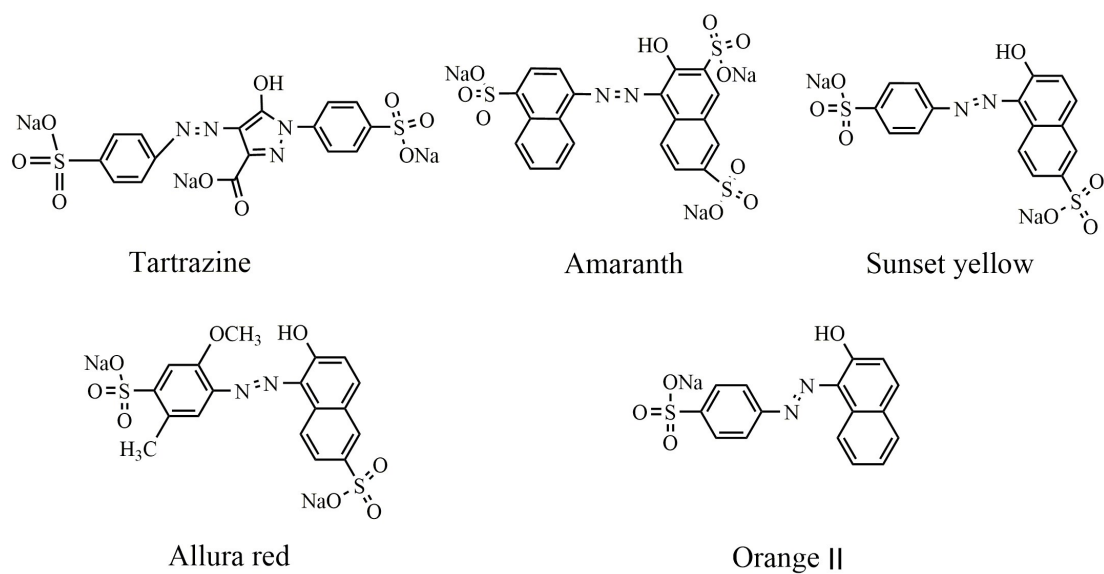

Figure S1 Chemical structure of synthetic dyes mentioned in this work

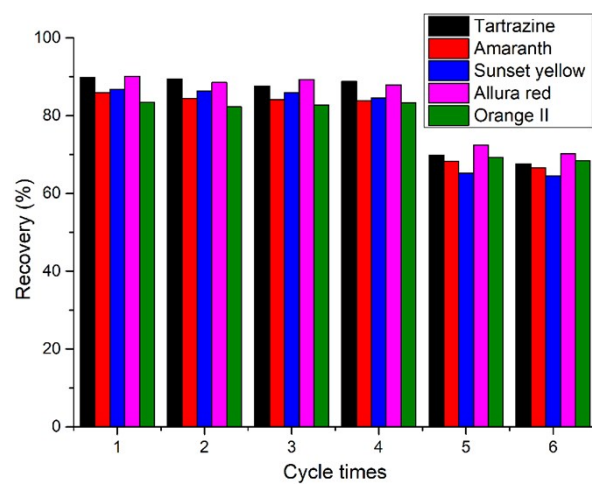

Figure S2 Reusability of MSN-NH<sub>2</sub> for extraction of synthetic dyes

Table S1 Elemental analysis of MSN and MSN-NH<sub>2</sub>

| Adsorbents          | N (%) | C (%) | H (%) |
|---------------------|-------|-------|-------|
| MSN                 | 0     | 3.35  | 1.174 |
| MSN-NH <sub>2</sub> | 2.82  | 8.54  | 2.702 |

Table S2 Pore characterizations of MSN, MSN-NH<sub>2</sub>, and MSN-COOH

| Samples             | Surface area (m <sup>2</sup> g <sup>-1</sup> ) | Porevolume (cm <sup>3</sup> g <sup>-1</sup> ) | Pore size (nm)    |
|---------------------|------------------------------------------------|-----------------------------------------------|-------------------|
| MSN                 | 584.98                                         | 1.175                                         | 1.68 <sup>a</sup> |
| MSN-NH <sub>2</sub> | 192.51                                         | 0.826                                         | n.a.              |
| MSN-COOH            | 161.51                                         | 0.953                                         | n.a.              |

<sup>a</sup> Estimated by NL-DFT method; n.a.: not applicable
